# Supplementary material
Source: publisher site journal article supplement (https://www.dovepress.com/article/228843)
Supplement: Supplementary file 1 [file get_supplementary_file.php]

**Supplementary Table 1.** The Chinese version of Shame and Stigma Scale

**頭頸癌患者羞恥與污名化中文版量表**

請在下列描述中圈選最符合您過去7天情形的選項

|  | 從未 | 很少 | 有時候 | 經常 | 總是 |
| --- | --- | --- | --- | --- | --- |
| 1. 我喜歡我的外表 | 0 | 1 | 2 | 3 | 4 |
| 1. 我儘量不去看鏡子裡的自己 | 0 | 1 | 2 | 3 | 4 |
| 1. 我的外表讓我感到自卑 | 0 | 1 | 2 | 3 | 4 |
| 1. 我能接受我的臉或脖子的模樣 | 0 | 1 | 2 | 3 | 4 |
| 1. 我覺得別人都盯著我看 | 0 | 1 | 2 | 3 | 4 |
| 1. 我因為我的外貌而避免與人接觸 | 0 | 1 | 2 | 3 | 4 |
| 1. 我喜歡出入公共場所 | 0 | 1 | 2 | 3 | 4 |
| 1. 我對於我的臉或脖子的改變感到苦惱 | 0 | 1 | 2 | 3 | 4 |
| 1. 我覺得別人會認為我應該為自己的罹癌負責 | 0 | 1 | 2 | 3 | 4 |
| 1. 告訴別人自己罹癌，我會覺得很尷尬 | 0 | 1 | 2 | 3 | 4 |
| 1. 我對於自己罹癌感到很自卑 | 0 | 1 | 2 | 3 | 4 |
| 1. 別人會因為我罹癌而躲避我 | 0 | 1 | 2 | 3 | 4 |
| 1. 我很希望將自己罹癌這件事保密 | 0 | 1 | 2 | 3 | 4 |
| 1. 我感覺到別人因為我在旁而緊張不自在 | 0 | 1 | 2 | 3 | 4 |
| 1. 我覺得非常後悔 | 0 | 1 | 2 | 3 | 4 |
| 1. 如果能夠重來，很多事情我會有不同的作法 | 0 | 1 | 2 | 3 | 4 |
| 1. 我對於我之前做過的事情感到遺憾 | 0 | 1 | 2 | 3 | 4 |
| 1. 我對於聲音的變化感到很尷尬 | 0 | 1 | 2 | 3 | 4 |
| 1. 我儘量不與別人說話 | 0 | 1 | 2 | 3 | 4 |
| 1. 我能夠與別人交談無礙 | 0 | 1 | 2 | 3 | 4 |

**Note:** See Table 2 for English version.

**Supplementary Table 2.** Internal consistency and descriptive statistics for the Shame & Stigma Scale item-total score

|  | **Item** | **Scale mean if**  **item deleted** | **Scale variance if item deleted** | **Alpha if**  **item deleted** |
| --- | --- | --- | --- | --- |
| **Shame with Appearance** |  |  |  |  |
|  | 1 | 16.46 | 135.79 | 0.84 |
|  | 2 | 16.97 | 140.04 | 0.84 |
|  | 3 | 16.99 | 136.30 | 0.84 |
|  | 4 | 16.71 | 139.59 | 0.84 |
|  | 5 | 16.92 | 137.13 | 0.84 |
|  | 6 | 16.99 | 133.80 | 0.83 |
|  | 8 | 16.44 | 130.83 | 0.83 |
|  | 14 | 17.20 | 138.22 | 0.84 |
| **Regret** |  |  |  |  |
|  | 15 | 16.29 | 132.46 | 0.84 |
|  | 16 | 16.18 | 133.33 | 0.84 |
|  | 17 | 16.41 | 131.27 | 0.83 |
| **Social/Speech Concerns** |  |  |  |  |
|  | 18 | 16.75 | 132.23 | 0.83 |
|  | 19 | 16.52 | 133.46 | 0.84 |
|  | 20 | 16.38 | 132.22 | 0.84 |
| **Self-discrimination** |  |  |  |  |
|  | 10 | 16.85 | 133.05 | 0.83 |
|  | 13 | 16.16 | 140.66 | 0.85 |
| **Sense of Stigma** |  |  |  |  |
|  | 11 | 17.14 | 137.12 | 0.83 |
|  | 12 | 16.91 | 141.79 | 0.84 |

Total: alpha=0.845 Mean=17.51 SD= 12.208

|  | **Test-retest** | |  | **Inter-rater** | |
| --- | --- | --- | --- | --- | --- |
|  | **Pearson coefficient r** | **P-value** |  | **Pearson coefficient r** | **P-value** |
| SSS1 | 0.481 | <0.001 |  | 0.598 | <0.001 |
| SSS2 | 0.239 | 0.094 |  | 0.570 | <0.001 |
| SSS3 | 0.532 | <0.001 |  | 0.826 | <0.001 |
| SSS4 | 0.190 | 0.186 |  | 0.326 | 0.021 |
| SSS5 | 0.455 | 0.001 |  | 0.637 | <0.001 |
| SSS6 | 0.189 | 0.188 |  | 0.527 | <0.001 |
| SSS7 | 0.295 | 0.037 |  | 0.630 | <0.001 |
| SSS8 | 0.521 | <0.001 |  | 0.570 | <0.001 |
| SSS9 | 0.367 | 0.009 |  | 0.537 | <0.001 |
| SSS10 | 0.504 | <0.001 |  | 0.610 | <0.001 |
| SSS11 | 0.680 | <0.001 |  | 0.677 | <0.001 |
| SSS12 | 0.292 | 0.040 |  | 0.526 | <0.001 |
| SSS13 | 0.495 | <0.001 |  | 0.362 | 0.010 |
| SSS14 | 0.334 | 0.018 |  | 0.234 | 0.103 |
| SSS15 | 0.654 | <0.001 |  | 0.617 | <0.001 |
| SSS16 | 0.618 | <0.001 |  | 0.804 | <0.001 |
| SSS17 | 0.592 | <0.001 |  | 0.762 | <0.001 |
| SSS18 | 0.588 | <0.001 |  | 0.612 | <0.001 |
| SSS19 | 0.493 | <0.001 |  | 0.598 | <0.001 |
| SSS20 | 0.567 | <0.001 |  | 0.568 | <0.001 |
| SSS Total | 0.655 | <0.001 |  | 0.840 | <0.001 |

**Supplementary Table 3** The test-retest and inter-rater reliability of the Shame & Stigma Scale (N=50)
